# Supplementary material for: Molecular evolution of a chordate specific family of G protein-coupled receptors
Source: PubMed Central journal article supplement (PMC3238225; doi:10.1186/1471-2148-11-234), 2011-08-09

**A**

5A/D  
 5A  
 5B  
 5C  
 5D

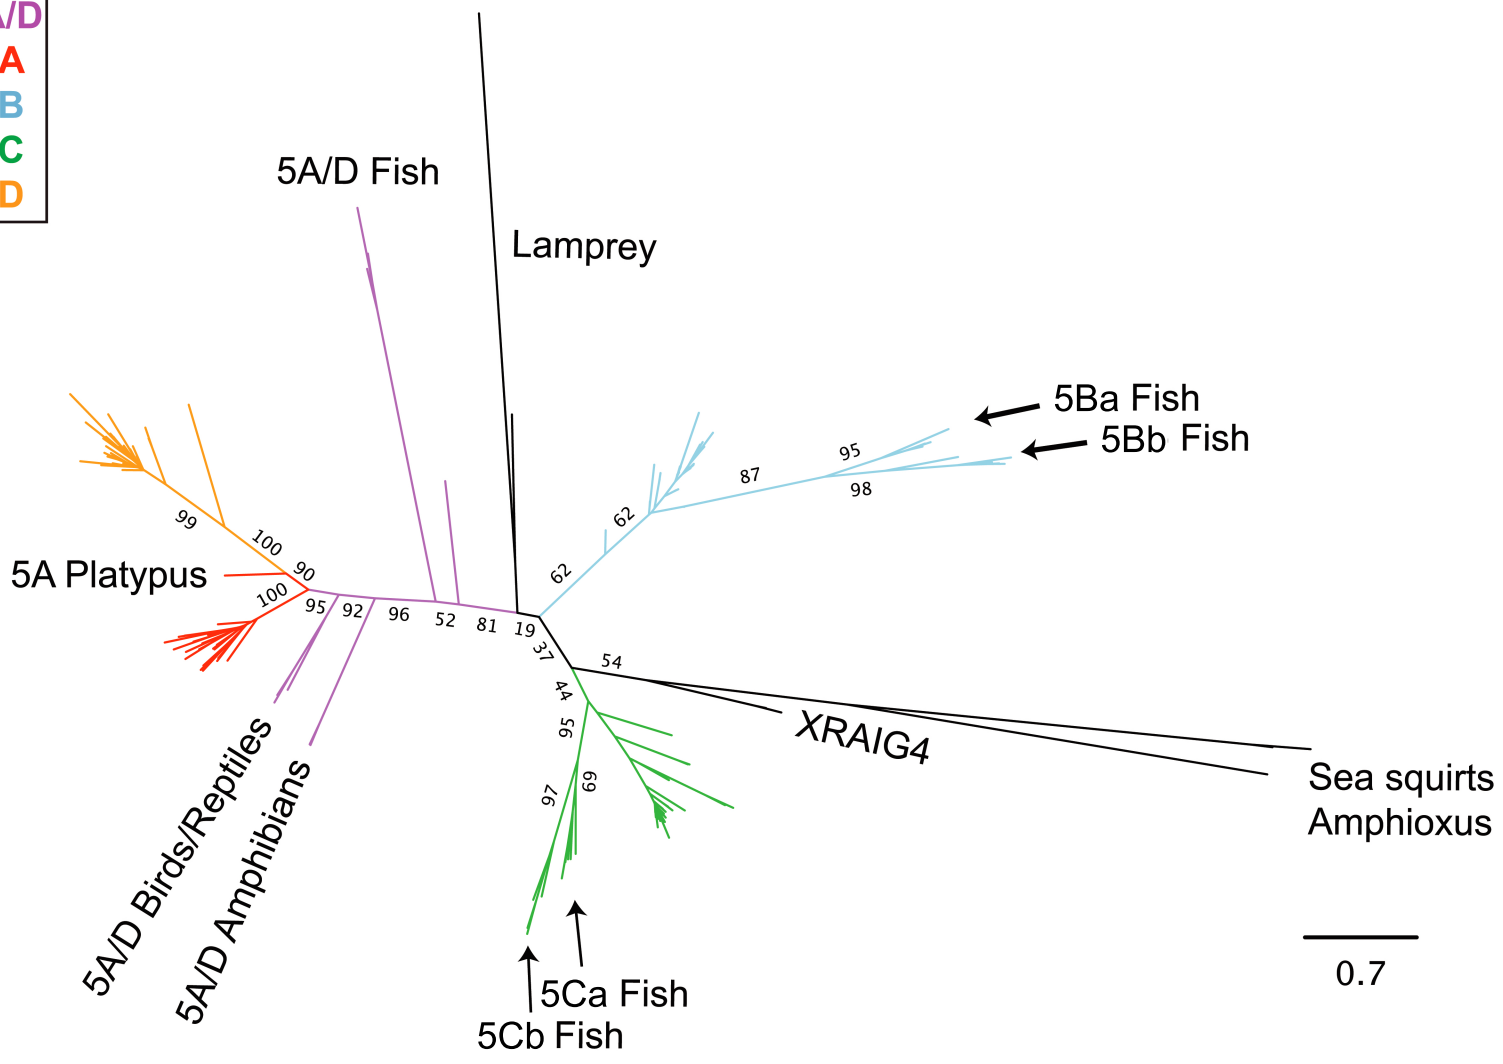**B**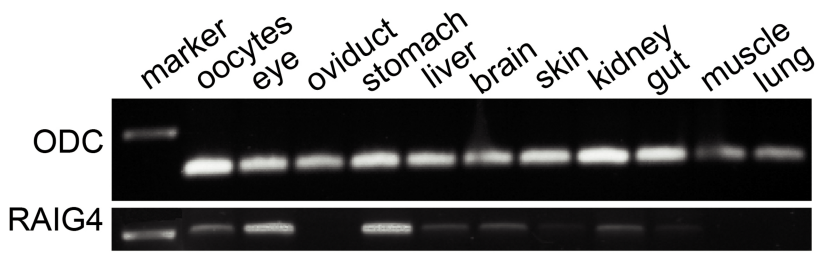

Supplement: 1471-2148-11-234-S1.pdf [file 1471-2148-11-234-S1.pdf]
