# Supplementary material for: Molecular evolution of a chordate specific family of G protein-coupled receptors
Source: PubMed Central journal article supplement (PMC3238225; doi:10.1186/1471-2148-11-234), 2011-08-09
Supplement: 1471-2148-11-234-S2.pdf [file 1471-2148-11-234-S2.pdf]

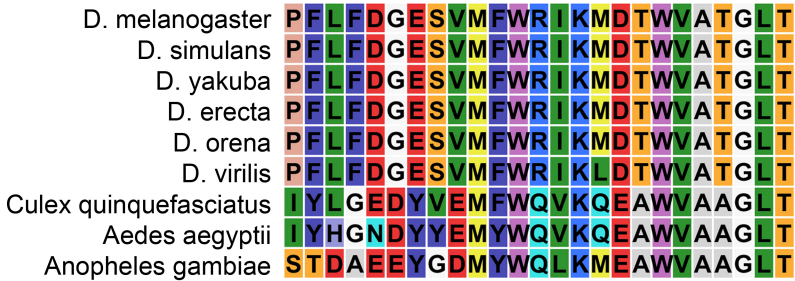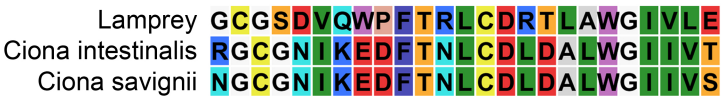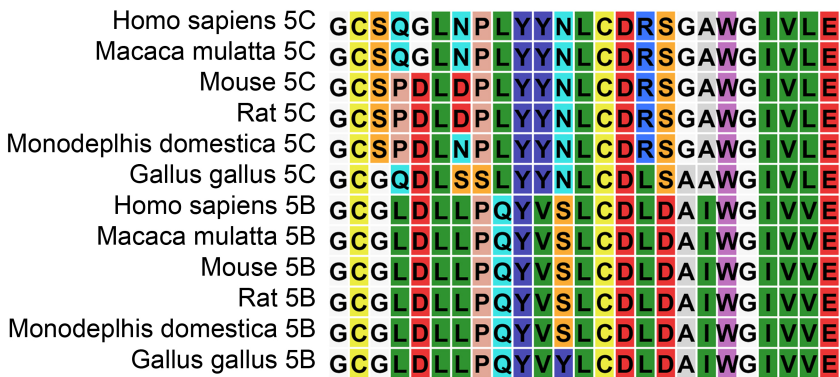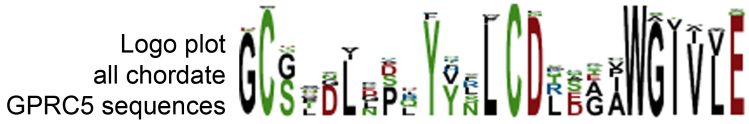

N-terminus

TM1
