# Supplementary material for: Molecular evolution of a chordate specific family of G protein-coupled receptors
Source: PubMed Central journal article supplement (PMC3238225; doi:10.1186/1471-2148-11-234), 2011-08-09
Supplement: 1471-2148-11-234-S3.pdf [file 1471-2148-11-234-S3.pdf]

## GPRC5C

|                          |                                |                |                               |        |              |               |         |               |
|--------------------------|--------------------------------|----------------|-------------------------------|--------|--------------|---------------|---------|---------------|
| <i>Homo sapiens</i>      | Dna I2                         | KIF19          | BTB(POZ) domain containing 17 | GPR142 |              | <b>GPRC5C</b> | CD300a  | CD300b        |
| <i>Mus musculus</i>      | Dna I2                         | KIF19          | BTB(POZ) domain containing 17 | GPR142 |              | <b>GPRC5C</b> | CD300a  | CD300b        |
| <i>Rattus norvegicus</i> | Dna I2                         | KIF19          | BTB(POZ) domain containing 17 | GPR142 |              | <b>GPRC5C</b> | CD300a  | CD300b        |
| <i>Bos taurus</i>        | Dna I2                         | KIF19          | BTB(POZ) domain containing 17 | GPR142 |              | <b>GPRC5C</b> | CD300a  | CD300b        |
| <i>Canis familiaris</i>  | Dna I2                         | KIF19          | BTB(POZ) domain containing 17 | GPR142 |              | <b>GPRC5C</b> | CD300a  | CD300b        |
| <i>Equus caballus</i>    | Dna I2                         | KIF19          | BTB(POZ) domain containing 17 | GPR142 |              | <b>GPRC5C</b> | CD300a  | CD300b        |
| <i>Gallus gallus</i>     | Dna I2                         | LOC771601<br>ψ | BTB(POZ) domain containing 17 |        |              | <b>GPRC5C</b> | Ccdc137 | C17orf90-like |
| <i>Danio rerio</i>       | LOC564522<br>potassium channel | Map2k6         | BTB(POZ) domain containing 17 | GPR142 | LOC100536759 | <b>GPRC5C</b> | CD300a  | CD300b        |

## GPRC5B

|                              |             |               |               |         |                                                      |            |
|------------------------------|-------------|---------------|---------------|---------|------------------------------------------------------|------------|
| <i>Homo sapiens</i>          | <b>IQCK</b> | <b>GPRC5B</b> | <b>GPR139</b> | SALL4P3 | small nuclear ribonucleoprotein polypeptide E $\psi$ | <b>GP2</b> |
| <i>Pan troglodytes</i>       | <b>IQCK</b> | <b>GPRC5B</b> | <b>GPR139</b> | SALL4P3 | small nuclear ribonucleoprotein polypeptide E-like   | <b>GP2</b> |
| <i>Macaca Mulatta</i>        | <b>IQCK</b> | <b>GPRC5B</b> | <b>GPR139</b> | SALL4P3 | small nuclear ribonucleoprotein polypeptide E-like   | <b>GP2</b> |
| <i>Callitrix jacchus</i>     | <b>IQCK</b> | <b>GPRC5B</b> | <b>GPR139</b> | SALL4P3 |                                                      | <b>GP2</b> |
| <i>Mus musculus</i>          | <b>IQCK</b> | <b>GPRC5B</b> | <b>GPR139</b> |         | GM4080                                               | <b>GP2</b> |
| <i>Rattus norvegicus</i>     | <b>IQCK</b> | <b>GPRC5B</b> | <b>GPR139</b> |         |                                                      | <b>GP2</b> |
| <i>Bos taurus</i>            | <b>IQCK</b> | <b>GPRC5B</b> | <b>GPR139</b> |         |                                                      | <b>GP2</b> |
| <i>Canis familiaris</i>      | <b>IQCK</b> | <b>GPRC5B</b> | <b>GPR139</b> |         |                                                      | <b>GP2</b> |
| <i>Oryctolagus cuniculus</i> | <b>IQCK</b> | <b>GPRC5B</b> | <b>GPR139</b> |         |                                                      | <b>GP2</b> |
| <i>Gallus gallus</i>         | <b>IQCK</b> | <b>GPRC5B</b> | <b>GPR139</b> | PDILT   | ACSM5                                                | ACSM4      |

## GPRC5A and GPRC5D

|                          |         |                         |                               |                             |                                  |               |                                                    |               |                               |               |
|--------------------------|---------|-------------------------|-------------------------------|-----------------------------|----------------------------------|---------------|----------------------------------------------------|---------------|-------------------------------|---------------|
| <i>Homo sapiens</i>      | ApoL D1 | DEAD box polypeptide 47 | Ribosomal protein L37a $\psi$ | Ribosomal protein S6 $\psi$ | ribosomal protein L13a $\psi$ 20 | <b>GPRC5A</b> | Mir614                                             | <b>GPRC5D</b> |                               | <b>HEBP 1</b> |
| <i>Pan troglodytes</i>   | ApoL D1 | DEAD box polypeptide 47 | Ribosomal protein L37a $\psi$ | Ribosomal protein S6 $\psi$ | ribosomal protein L13a $\psi$ 20 | <b>GPRC5A</b> | Mir614                                             | <b>GPRC5D</b> |                               | <b>HEBP 1</b> |
| <i>Macaca mulatta</i>    |         | DEAD box polypeptide 47 | Ribosomal protein L37a $\psi$ | Ribosomal protein S6 $\psi$ |                                  | <b>GPRC5A</b> |                                                    | <b>GPRC5D</b> |                               | <b>HEBP1</b>  |
|                          |         |                         |                               |                             |                                  |               |                                                    |               |                               |               |
| <i>Mus musculus</i>      | ApoL D1 | DEAD box polypeptide 47 |                               |                             |                                  | <b>GPRC5A</b> |                                                    | <b>GPRC5D</b> | similar to ribosomal prot. 17 | <b>HEBP 1</b> |
| <i>Rattus norvegicus</i> | ApoL D1 | DEAD box polypeptide 47 |                               |                             |                                  | <b>GPRC5A</b> |                                                    | <b>GPRC5D</b> | similar to ribosomal prot. 17 | <b>HEBP 1</b> |
| <i>Bos taurus</i>        | ApoL D1 | DEAD box polypeptide 47 |                               |                             |                                  | <b>GPRC5A</b> | eukaryotic translation initiation factor 3, $\psi$ | <b>GPRC5D</b> |                               | <b>HEBP 1</b> |
| <i>Canis familiaris</i>  | ApoL D1 | DEAD box polypeptide 47 |                               |                             |                                  | <b>GPRC5A</b> |                                                    | <b>GPRC5D</b> |                               | <b>HEBP 1</b> |
| <i>Gallus gallus</i>     | ApoL D1 | DEAD box polypeptide 47 |                               |                             |                                  | <b>GPRC5A</b> |                                                    | <b>GPRC5D</b> |                               | <b>HEBP 1</b> |
