# Supplementary material for: Molecular evolution of a chordate specific family of G protein-coupled receptors
Source: PubMed Central journal article supplement (PMC3238225; doi:10.1186/1471-2148-11-234), 2011-08-09
Supplement: 1471-2148-11-234-S6.pdf [file 1471-2148-11-234-S6.pdf]

# A

|                      |                   |                           |                   |
|----------------------|-------------------|---------------------------|-------------------|
| 5BPanTroglodytes     | I Q E D E T I C S | 5DPanTroglodytes          | I E L N Q Q T A P |
| 5BHomosapiens        | I Q E D E T I C S | 5DHomosapiens             | I E L N Q Q T A P |
| 5BMusmusculus        | I Q M D E T I C S | 5DMusmusculus             | I Q L N H Q T A P |
| 5BRattusnorvegicus   | I R M D E T I C S | 5DRattusnorvegicus        | I Q L N Q Q T A P |
| 5BCanisfamiliaris    | I R E D E T I C S | 5DCanisFamiliaris         | A Q F N Q Q T A P |
| 5BFeliscatus         | I R E D E T I C S | 5DFeliscatus              | T Q F N Q Q T A P |
| 5BBostaurus          | I R E D E T I C S | 5DBostaurus               | I Q L N Q Q T A P |
|                      |                   |                           |                   |
| 5BGallusgallus       | I Q E D E M V C S | 5APanTroglodytes          | I G L D G S T G P |
| 5BTaeniopygiaguttata | I Q E D E M V C S | 5AHomosapiens             | I G L D G S T G P |
| 5BAnolisCarolinensis | I E E D E T L C S | 5AMusmusculus             | I K L D G A T G P |
| 5BXenopusLaevis      | I Q E D E A I C C | 5ARattusnorvegicus        | I K L D R A T G P |
| callorinchus         | I P E D E K T C P | 5ACanisfamiliaris         | I Q L D G S T G P |
|                      |                   | 5AFeliscatus              | I Q L D G S T G P |
| 5CHomosapiens        | V K P D F S T C A | 5ABostaurus               | I T L D G G T G P |
| 5CPanTroglodytes     | V K P D F S T C A |                           |                   |
| 5CMusmusculus        | V K P D F S T C A | 5AGallusgallus            | I R S N E R I R P |
| 5CRattusnorvegicus   | V K P D F S T C A | 5ATAeniopygiaguttata      | I K L N D R T R P |
| 5CCanisfamiliaris    | V K P N F S T C A | 5AAnoliscarolinensis      | I K L N E T T A P |
| 5CMa                 | V K P D F S T C A |                           |                   |
| 5CFeliscatus         | V K P D F S T C A | 5A/D Xenopus laevis       | V E L T E Q T C P |
| 5CBostaurus          | V K P S F S T C A | 5A/D Xenopus tropicalis   | V E L T D Q T C P |
|                      |                   | callorinchus AAVX01070430 | I K L D H R T C P |
|                      |                   |                           |                   |
| 5CGallusgallus       | V G P D F S T C T |                           |                   |
| 5CTaeniopygiaguttata | V G P D F S T C T |                           |                   |
| 5CAnolisCarolinensis | V K Q D F S T C A |                           |                   |
| 5CXenopuslaevis      | V K K D F A T C A |                           |                   |
| callorinchus         | V K M N F A T C A |                           |                   |
| lamprey              | V M N T P Q T C P |                           |                   |
|                      |                   |                           |                   |
| Cionaintestinalis    | V K P S V I V C Y |                           |                   |
| Cionasavignyi        | I K P S P I V C C |                           |                   |

# B

|     |    |                                                   |
|-----|----|---------------------------------------------------|
| IL3 | 5C | L C G R (YF) K R W R K H G (VI) F (VI) L L        |
|     |    | 1 5 8 14 10                                       |
| IL3 | 5B | L C G K F K R W K (LQ) N G (AV) (FC) (IL)(IL)(VI) |
|     |    | 1 5 8 14 10                                       |
| IL2 | 5A | L L (AV) H A X X L X (RK) L (VA) R G X X P (LF) S |
|     |    | 1 5 8 8 14 14                                     |
