# Supplementary material for: Molecular evolution of a chordate specific family of G protein-coupled receptors
Source: PubMed Central journal article supplement (PMC3238225; doi:10.1186/1471-2148-11-234), 2011-08-09
Supplement: 1471-2148-11-234-S7.pdf [file 1471-2148-11-234-S7.pdf]

Mus musculus GPRC5A

Mttpraapsgrsdlldsrhrlcdlaegwgialaetlaavgavatvacmfalvflickvqdsnrkmlp  
aqflfllgvlgvfgltfafiikldgatgptrfflfgvlfaicfscllahafnlklvrgrkplswlvi  
lslavgfslvqdviaieylvltmnrtnvnvsefpaprrhedfvmlliyvlvlmvlthffasflvfcgs  
fsgwkrhgfhicftsflsiaiwwavivlllipdidrkwdtdilstalvangwvflafyilpefrqlpr  
qrsptdypvedafckpqlmkqsygvenraysqeeitqglemgdtlyapysthfqlqnhqkdfsipraq  
apaspyndyegrkgds

Mus musculus GPRC5D

Myedcvkstedyyllfcdnegpwaivleslavigivvtilllllafllmrkvqdcsqwnvlptqflfll  
avlgfvgltfafiqlnhqtagvryflfgvlfaicfscllahasnlvklvrgrvsfcwttlifaigv  
sllqtiiaieyvtlimtrglmfehmtpyqlnvdfvclliyvlflmaltffvskatfcgpcenwkqhgr  
lifatvlvsiiiwvwwismllrgnpqlqrqphwddaviciglvtnawvflliyipelsilyrscrqe  
cptqgnvcqvpvyqrsfrmdtqeptrec

Yellow - extracellular loops

Red - Sites showing negative selection (significance level p 0.1)
