# Supplementary material for: Molecular evolution of a chordate specific family of G protein-coupled receptors
Source: PubMed Central journal article supplement (PMC3238225; doi:10.1186/1471-2148-11-234), 2011-08-09
Supplement: 1471-2148-11-234-S8.pdf [file 1471-2148-11-234-S8.pdf]

Dienstag, 10. Mai 2011 13:44

|                              |                                                                                      |     |
|------------------------------|--------------------------------------------------------------------------------------|-----|
|                              |     |     |
|                              | ATGACATCCAAACATTTCTATTGATCCTG                                                        |     |
|                              | <hr/>                                                                                |     |
|                              | 10 20 30                                                                             |     |
| seq1(XRAIG4a)_EF456762.1.seq | ATGACATCCAAACATTTCTATTGATCCTG                                                        | 30  |
| seq1(XRAIG4b)_EF456763.1.seq | ATGACATCCAGACATTTCTACTGATCCTG                                                        | 30  |
| XRAIG4_NM_001173999.seq      | ATGACATCCAAACATTTCTATTGATCCTG                                                        | 30  |
|                              |    |     |
|                              | TGCATAATGGGCGCCATAAGGGACGCAGTG                                                       |     |
|                              | <hr/>                                                                                |     |
|                              | 40 50 60                                                                             |     |
| seq1(XRAIG4a)_EF456762.1.seq | TGCATAATGGGCGCCATAAGGGACGCAGTG                                                       | 60  |
| seq1(XRAIG4b)_EF456763.1.seq | TGCATGATGGGACCCATGAGAGAGGGCATTG                                                      | 60  |
| XRAIG4_NM_001173999.seq      | TGCATAATGGGCGCCATAAGGGACGCAGTG                                                       | 60  |
|                              |    |     |
|                              | TCTCTGAATCTCACAACTCCATCAGTGGAA                                                       |     |
|                              | <hr/>                                                                                |     |
|                              | 70 80 90                                                                             |     |
| seq1(XRAIG4a)_EF456762.1.seq | TCTCTGAATCTCACAACTCCATCAGTGGAA                                                       | 90  |
| seq1(XRAIG4b)_EF456763.1.seq | TCTCTGAATCTCACAACTCCATCAGTGGAA                                                       | 90  |
| XRAIG4_NM_001173999.seq      | TCTCTGAATCTCACAACTCCATCAGTGGAA                                                       | 90  |
|                              |    |     |
|                              | TTTCAGAACCTCTCAGCTGTGCCCATGGGT                                                       |     |
|                              | <hr/>                                                                                |     |
|                              | 100 110 120                                                                          |     |
| seq1(XRAIG4a)_EF456762.1.seq | TTTCGGAACCTCTCAGCTGTGCCCATGGGT                                                       | 120 |
| seq1(XRAIG4b)_EF456763.1.seq | TTACAGAACCTCTCAGCTGTGCCCATGGGT                                                       | 120 |
| XRAIG4_NM_001173999.seq      | TTTCAGAACCTCTCAGCTGTGCCCATGGGT                                                       | 120 |
|                              |  |     |
|                              | TGCAGTCGGGATGTCCCGTCCATTTTCTAC                                                       |     |
|                              | <hr/>                                                                                |     |
|                              | 130 140 150                                                                          |     |
| seq1(XRAIG4a)_EF456762.1.seq | TGCAGTCGGGATGTCCCGTCCATTTTCTAC                                                       | 150 |
| seq1(XRAIG4b)_EF456763.1.seq | TGCAGTCAGGATGTACCGTCAATATTCTAC                                                       | 150 |
| XRAIG4_NM_001173999.seq      | TGCAGTCGGGATGTCCCGTCCATTTTCTAC                                                       | 150 |
|                              |  |     |
|                              | TTTCTGTGTGACCTGAATGCAGCGTGGGGC                                                       |     |
|                              | <hr/>                                                                                |     |
|                              | 160 170 180                                                                          |     |
| seq1(XRAIG4a)_EF456762.1.seq | TTTCTGTGTGACCTGAATGCAGCGTGGGGC                                                       | 180 |
| seq1(XRAIG4b)_EF456763.1.seq | TCTCTGTGTGACCTGAATGCAGCTTGGGGC                                                       | 180 |
| XRAIG4_NM_001173999.seq      | TTTCTGTGTGACCTGAATGCAGCGTGGGGC                                                       | 180 |
|                              |  |     |
|                              | ATCATATTAGAGGCGTTGGCCGGGCTTGGA                                                       |     |
|                              | <hr/>                                                                                |     |
|                              | 190 200 210                                                                          |     |
| seq1(XRAIG4a)_EF456762.1.seq | ATCATATTAGAGGCGTTGGCCGGGCTTGGA                                                       | 210 |
| seq1(XRAIG4b)_EF456763.1.seq | ATTATATTAGAGGCGTTGGCCGGGCTTGGA                                                       | 210 |
| XRAIG4_NM_001173999.seq      | ATCATATTAGAGGCGTTGGCCGGGCTTGGA                                                       | 210 |

Dienstag, 10. Mai 2011 13:44

|                              |                                                                                      |     |
|------------------------------|--------------------------------------------------------------------------------------|-----|
|                              |     |     |
|                              | ATTATCTGCTCTCTTCTACTAGCTGTTATC                                                       |     |
|                              | 220                      230                      240                                |     |
| seq1(XRAIG4a)_EF456762.1.seq | ATTATCTGCTCTCTTCTACTAGCTGTTATC                                                       | 240 |
| seq1(XRAIG4b)_EF456763.1.seq | ATTATCTGCTCTCTTCTACTAGCTGTTATC                                                       | 240 |
| XRAIG4_NM_001173999.seq      | ATTATCTGCTCTCTTCTACTAGCTGTTATC                                                       | 240 |
|                              |    |     |
|                              | TTCTTGGCACTAGCACCTTCGGGTATGAGA                                                       |     |
|                              | 250                      260                      270                                |     |
| seq1(XRAIG4a)_EF456762.1.seq | TTCTTGGCACTAGCACCTTCGGGTATGAGA                                                       | 270 |
| seq1(XRAIG4b)_EF456763.1.seq | TTCTTGGCACTAGCACCTTCGGGTATGAGA                                                       | 270 |
| XRAIG4_NM_001173999.seq      | TTCTTGGCACTAGCACCTTCGGGTATGAGA                                                       | 270 |
|                              |    |     |
|                              | GACGAGCGCAAAGGATCCTTGGGCATAAAC                                                       |     |
|                              | 280                      290                      300                                |     |
| seq1(XRAIG4a)_EF456762.1.seq | GACGAGCGCAAAGGATCCTTGGGCATAAAC                                                       | 300 |
| seq1(XRAIG4b)_EF456763.1.seq | GACGAGCGCAAAGGATCCTTGGGCATAAAC                                                       | 300 |
| XRAIG4_NM_001173999.seq      | GACGAGCGCAAAGGATCCTTGGGCATAAAC                                                       | 300 |
|                              |    |     |
|                              | TTTATGTTCTCTGTTTGGTGTCTTTGGCCTG                                                      |     |
|                              | 310                      320                      330                                |     |
| seq1(XRAIG4a)_EF456762.1.seq | TTTATGTTCTCTGTTTGGTGTCTTTGGCCTG                                                      | 330 |
| seq1(XRAIG4b)_EF456763.1.seq | TTTATGTTCTCTGTTTGGTGTCTTTGGCCTG                                                      | 330 |
| XRAIG4_NM_001173999.seq      | TTTATGTTCTCTGTTTGGTGTCTTTGGCCTG                                                      | 330 |
|                              |  |     |
|                              | TTCTCTCTTGT TTTTGCCTTTATCATTGGA                                                      |     |
|                              | 340                      350                      360                                |     |
| seq1(XRAIG4a)_EF456762.1.seq | TTCTCTCTTGT TTTTGCCTTTATCATTGGA                                                      | 360 |
| seq1(XRAIG4b)_EF456763.1.seq | TTCTCTCTTGT TTTTGCCTTTATCATTGGA                                                      | 360 |
| XRAIG4_NM_001173999.seq      | TTCTCTCTTGT TTTTGCCTTTATCATTGGA                                                      | 360 |
|                              |  |     |
|                              | CCGAACACGGCAGTGTGTGAAGTGAGAAGA                                                       |     |
|                              | 370                      380                      390                                |     |
| seq1(XRAIG4a)_EF456762.1.seq | CCGAACACGGCAGTGTGTGAAGTGAGAAGA                                                       | 390 |
| seq1(XRAIG4b)_EF456763.1.seq | CCGAACACGGCAGTGTGTGAAGTGAGAAGA                                                       | 390 |
| XRAIG4_NM_001173999.seq      | CCGAACACGGCAGTGTGTGAAGTGAGAAGA                                                       | 390 |
|                              |  |     |
|                              | TTTCTATTTCGGAGTTTTGTTTGCCCTCTGC                                                      |     |
|                              | 400                      410                      420                                |     |
| seq1(XRAIG4a)_EF456762.1.seq | TTTCTATTTCGGAGTTTTGTTTGCCCTCTGC                                                      | 420 |
| seq1(XRAIG4b)_EF456763.1.seq | TTTCTATTTCGGAGTTTTGTTTGCCCTCTGC                                                      | 420 |
| XRAIG4_NM_001173999.seq      | TTTCTATTTCGGAGTTTTGTTTGCCCTCTGC                                                      | 420 |

Dienstag, 10. Mai 2011 13:44

|                              |                                                                                      |     |
|------------------------------|--------------------------------------------------------------------------------------|-----|
|                              |     |     |
|                              | TTTGCCAGCCTGGTGGCTCACTCTGTGAGG                                                       |     |
|                              | 430 440 450                                                                          |     |
| seq1(XRAIG4a)_EF456762.1.seq | TTTGCCAGCCTGGTGGCTCACTCTGTGAGG                                                       | 450 |
| seq1(XRAIG4b)_EF456763.1.seq | TTTGCCAGCCTGGTGGCTCACTCTGTGAGG                                                       | 450 |
| XRAIG4_NM_001173999.seq      | TTTGCCAGCCTGGTGGCTCACTCTGTGAGG                                                       | 450 |
|                              |    |     |
|                              | CTGAACTACCTAGCACTACACAATCACGGC                                                       |     |
|                              | 460 470 480                                                                          |     |
| seq1(XRAIG4a)_EF456762.1.seq | CTGAACTACCTAGCACTACACAATCACGGC                                                       | 480 |
| seq1(XRAIG4b)_EF456763.1.seq | CTGAACTACCTAGCACTACACAATCACGGC                                                       | 480 |
| XRAIG4_NM_001173999.seq      | CTGAACTACCTAGCACTACACAATCACGGC                                                       | 480 |
|                              |    |     |
|                              | CCAGGAGGAGGCTTGATATTTTTACTCGCC                                                       |     |
|                              | 490 500 510                                                                          |     |
| seq1(XRAIG4a)_EF456762.1.seq | CCAGGAGGAGGCTTGATATTTTTACTCGCC                                                       | 510 |
| seq1(XRAIG4b)_EF456763.1.seq | CCAGGAGGAGGCTTGATATTTTTACTCGCC                                                       | 510 |
| XRAIG4_NM_001173999.seq      | CCAGGAGGAGGCTTGATATTTTTACTCGCC                                                       | 510 |
|                              |    |     |
|                              | ACTGGACTTTTCTTGGTGGAGGCTGTAATA                                                       |     |
|                              | 520 530 540                                                                          |     |
| seq1(XRAIG4a)_EF456762.1.seq | ACTGGACTTTTCTTGGTGGAGGCTGTAATA                                                       | 540 |
| seq1(XRAIG4b)_EF456763.1.seq | ACTGGACTTTTCTTGGTGGAGGCTGTAATA                                                       | 540 |
| XRAIG4_NM_001173999.seq      | ACTGGACTTTTCTTGGTGGAGGCTGTAATA                                                       | 540 |
|                              |  |     |
|                              | AATGCAGAATGGCTTCTCATCACTAATGTC                                                       |     |
|                              | 550 560 570                                                                          |     |
| seq1(XRAIG4a)_EF456762.1.seq | AATGCAGAATGGCTTCTCATCACTAATGTC                                                       | 570 |
| seq1(XRAIG4b)_EF456763.1.seq | AATGCAGAATGGCTTCTCATCACTAATGTC                                                       | 570 |
| XRAIG4_NM_001173999.seq      | AATGCAGAATGGCTTCTTATCACTAATGTC                                                       | 570 |
|                              |  |     |
|                              | CGACATAACCTTCCATCAGCTATCTCAATA                                                       |     |
|                              | 580 590 600                                                                          |     |
| seq1(XRAIG4a)_EF456762.1.seq | CGACATAACCTTCCATCAGCTATCTCAATA                                                       | 600 |
| seq1(XRAIG4b)_EF456763.1.seq | CGACATAACCTTCCATCAGCTATCTCAATA                                                       | 600 |
| XRAIG4_NM_001173999.seq      | CGACATAACCTTCCATCAGCTATCTCAATA                                                       | 600 |
|                              |  |     |
|                              | GGACATCCTTGTAAATATAGATAACCAAGAC                                                      |     |
|                              | 610 620 630                                                                          |     |
| seq1(XRAIG4a)_EF456762.1.seq | GGACATCCTTGTAAATATAGATAACCAAGAC                                                      | 630 |
| seq1(XRAIG4b)_EF456763.1.seq | GGACATCCTTGTAAATATAGATAACCAAGAC                                                      | 630 |
| XRAIG4_NM_001173999.seq      | GGACATCCTTGTAAATATAGATAACCAAGAC                                                      | 630 |

Dienstag, 10. Mai 2011 13:44

|                              |                                                                                                                                                                  |     |
|------------------------------|------------------------------------------------------------------------------------------------------------------------------------------------------------------|-----|
|                              | <br>T T T G T G A C A T C T T T A G T C T A T G T C A T G T T T<br>640 650 660 |     |
| seq1(XRAIG4a)_EF456762.1.seq | T T T G T G A C A T C T T T A G T C T A T G T C A T G T T T                                                                                                      | 660 |
| seq1(XRAIG4b)_EF456763.1.seq | T T T G T G A C A T C T T T A G T C T A T G T C A T G T T T                                                                                                      | 660 |
| XRAIG4_NM_001173999.seq      | T T T G T G A C A T C T T T A G T C T A T G T C A T G T T T                                                                                                      | 660 |
|                              | <br>C T T A T T C T A G C C G C T C T G A T T A T T C C T T G C<br>670 680 690 |     |
| seq1(XRAIG4a)_EF456762.1.seq | C T T A T T C T A G C C G C T C T G A T T A T T C C T T G C                                                                                                      | 690 |
| seq1(XRAIG4b)_EF456763.1.seq | C T T A T T C T A G C C G C T C T G A T T A T T C C T T G C                                                                                                      | 690 |
| XRAIG4_NM_001173999.seq      | C T T A T T C T A G C C G C T C T G A T T A T T C C T T G C                                                                                                      | 690 |
|                              | <br>C C G G T A C T T T G C G G A C A C T A T X X X X X X X X X<br>700 710 720 |     |
| seq1(XRAIG4a)_EF456762.1.seq | C C G G T A C T T T G C G G A C A C T A T                                                                                                                        | 711 |
| seq1(XRAIG4b)_EF456763.1.seq | C C G G T A C T T T G C G G A C A C T A T                                                                                                                        | 711 |
| XRAIG4_NM_001173999.seq      | C C G G T A C T T T G C G G A C A C T A T T T G C C T T G G                                                                                                      | 720 |
|                              | <br>X X X X X X X X X X X X X X X X X X X X X X X X X X X X X<br>730 740 750   |     |
| seq1(XRAIG4a)_EF456762.1.seq |                                                                                                                                                                  | 711 |
| seq1(XRAIG4b)_EF456763.1.seq |                                                                                                                                                                  | 711 |
| XRAIG4_NM_001173999.seq      | A A A C G C C A T G G C A A G T A T A T T G T G G T A A C T                                                                                                      | 750 |
|                              | <br>X X X X X X X X X X X X X X X X X X X X X X X X X X X X X<br>760 770 780 |     |
| seq1(XRAIG4a)_EF456762.1.seq |                                                                                                                                                                  | 711 |
| seq1(XRAIG4b)_EF456763.1.seq |                                                                                                                                                                  | 711 |
| XRAIG4_NM_001173999.seq      | G C C T T C C T C T C T C T T T C C A T C T G G G T G A T C                                                                                                      | 780 |
|                              | <br>X X X X X X X X X X X X X X X X X X X X X X X X X X X X X<br>790 800 810 |     |
| seq1(XRAIG4a)_EF456762.1.seq |                                                                                                                                                                  | 711 |
| seq1(XRAIG4b)_EF456763.1.seq |                                                                                                                                                                  | 711 |
| XRAIG4_NM_001173999.seq      | T G G A T T G T G A T G T A C C T C T A T G G C A A T G A C                                                                                                      | 810 |
|                              | <br>X X X X X X X X X X X X X X X X X X X X X X X X X X X X X<br>820 830 840 |     |
| seq1(XRAIG4a)_EF456762.1.seq |                                                                                                                                                                  | 711 |
| seq1(XRAIG4b)_EF456763.1.seq |                                                                                                                                                                  | 711 |
| XRAIG4_NM_001173999.seq      | A A A T T A G G C C A G C G G T A C T G G G A T G A C C C A                                                                                                      | 840 |

Dienstag, 10. Mai 2011 13:44

XXXXXXXXXXXXXXXXXXXXXXXXXXXXXXXXXXXXXXXXXXXX

850 860 870

seq1(XRAIG4a)\_EF456762.1.seq 711

seq1(XRAIG4b)\_EF456763.1.seq 711

XRAIG4\_NM\_001173999.seq GTTCTTGCCATTGCTTTAGTGTCCAATGGC 870

XXXXXXXXXXXXXXXXXXXXXXXXXXXXXXXXXXXXXXXXXXXX

880 890 900

seq1(XRAIG4a)\_EF456762.1.seq 711

seq1(XRAIG4b)\_EF456763.1.seq 711

XRAIG4\_NM\_001173999.seq TGGGTATTTATTTCTTTACTTTATTCCG 900

XXXXXXXXXXXXXXXXXXXXXXXXXXXXXXXXXXXXXXXXXXXX

910 920 930

seq1(XRAIG4a)\_EF456762.1.seq 711

seq1(XRAIG4b)\_EF456763.1.seq 711

XRAIG4\_NM\_001173999.seq GAACTCCTGGAAATGACAAGGACGGGGTAT 930

XXXXXXXXXXXXXXXXXXXXXXXXXXXXXXXXXXXXXXXXXXXX

940 950 960

seq1(XRAIG4a)\_EF456762.1.seq 711

seq1(XRAIG4b)\_EF456763.1.seq 711

XRAIG4\_NM\_001173999.seq GGATACGAGACAGAAACCCTGAACATGATA 960

XXXXXXXXXXXXXXXXXXXXXXXXXXXXXXXXXXXXXXXXXXXX

970 980 990

seq1(XRAIG4a)\_EF456762.1.seq 711

seq1(XRAIG4b)\_EF456763.1.seq 711

XRAIG4\_NM\_001173999.seq AAAAGGTTTGAGGAAACGTCCACCTTCTTTC 990

XXXXXXXXXXXXXXXXXXXXXXXXXXXXXXXXXXXXXXXXXXXX

1000 1010 1020

seq1(XRAIG4a)\_EF456762.1.seq 711

seq1(XRAIG4b)\_EF456763.1.seq 711

XRAIG4\_NM\_001173999.seq ATTATGGAGAACAAGGGCGTTCACTATGGAA 1020

XXXXXXXXXXXXXXXXXXXXXXXXXXXXXXXXXXXXXXXXXXXX

1030 1040 1050

seq1(XRAIG4a)\_EF456762.1.seq 711

seq1(XRAIG4b)\_EF456763.1.seq 711

XRAIG4\_NM\_001173999.seq AACCTGGAGATGACTGATCACGTGGAAACT 1050

|                              |                                                                                      |      |
|------------------------------|--------------------------------------------------------------------------------------|------|
|                              |     |      |
|                              | X X X X X X X X X X X X X X X X X X X X X X X X X X X X                              |      |
|                              | <hr/>                                                                                |      |
|                              | 1060 1070 1080                                                                       |      |
| seq1(XRAIG4a)_EF456762.1.seq |                                                                                      | 711  |
| seq1(XRAIG4b)_EF456763.1.seq |                                                                                      | 711  |
| XRAIG4_NM_001173999.seq      | A T A A A A A T C C A A G A C A A A C C T G T T T C T C C G                          | 1080 |
|                              |    |      |
|                              | X X X X X X X X X X X X X X X X X X X X X X X X X X X X                              |      |
|                              | <hr/>                                                                                |      |
|                              | 1090 1100 1110                                                                       |      |
| seq1(XRAIG4a)_EF456762.1.seq |                                                                                      | 711  |
| seq1(XRAIG4b)_EF456763.1.seq |                                                                                      | 711  |
| XRAIG4_NM_001173999.seq      | T A C A G T A A C T A T T G C G G A C T C T A T C C A A C G                          | 1110 |
|                              |    |      |
|                              | X X X X X X X X X X X X X X X X X X X X X X X X X X X X                              |      |
|                              | <hr/>                                                                                |      |
|                              | 1120 1130 1140                                                                       |      |
| seq1(XRAIG4a)_EF456762.1.seq |                                                                                      | 711  |
| seq1(XRAIG4b)_EF456763.1.seq |                                                                                      | 711  |
| XRAIG4_NM_001173999.seq      | T T G C C T T T G T A C C C A T C G G A T G T G G A G A C A                          | 1140 |
|                              |    |      |
|                              | X X X X X X X X X X X X X X X X X X X X X X X X X X X X                              |      |
|                              | <hr/>                                                                                |      |
|                              | 1150 1160 1170                                                                       |      |
| seq1(XRAIG4a)_EF456762.1.seq |                                                                                      | 711  |
| seq1(XRAIG4b)_EF456763.1.seq |                                                                                      | 711  |
| XRAIG4_NM_001173999.seq      | G T C A A C C A C G T A C C T C T G C C G C G C A T T T C C                          | 1170 |
|                              |  |      |
|                              | X X X X X X X X X X X X X X X X X X X X X X X X X X X X                              |      |
|                              | <hr/>                                                                                |      |
|                              | 1180 1190                                                                            |      |
| seq1(XRAIG4a)_EF456762.1.seq |                                                                                      | 711  |
| seq1(XRAIG4b)_EF456763.1.seq |                                                                                      | 711  |
| XRAIG4_NM_001173999.seq      | A T G G A G C C C T G G A G A T A C C G T C T G T A G                                | 1197 |
