# Supplementary material for: Molecular evolution of a chordate specific family of G protein-coupled receptors
Source: PubMed Central journal article supplement (PMC3238225; doi:10.1186/1471-2148-11-234), 2011-08-09
Supplement: 1471-2148-11-234-S9.pdf [file 1471-2148-11-234-S9.pdf]

|                       |                    |                    |                    |                    |                    |     |
|-----------------------|--------------------|--------------------|--------------------|--------------------|--------------------|-----|
| 5D Tursiops truncatus | MNEDCEESTG         | DCYFLCDTVG         | AWGIVLES- A        | SIGLAVTVLP         | P- AFLFLMRR        | 48  |
| Consensus 5D mammals  | MYEDCIESTG         | D- YYLCDTEG        | <b>PWGIVLES</b> LA | <b>IIGIVVTILL</b>  | <b>LLA</b> FLFLMRK | 49  |
|                       | ↓                  |                    |                    |                    | ↓                  |     |
|                       | 60                 |                    | 80                 |                    | 100                |     |
| 5D Tursiops truncatus | VQDRSQWNVL         | PTQFLFLLGG         | LGLLSLAF           | LIQLNQQTAP         | LHYFLFGVLF         | 98  |
| Consensus 5D mammals  | VQDCSQWNVL         | PTQ <b>FLFLLGV</b> | <b>LGLFGLAF</b>    | <b>IIQ</b> LNQQTAP | <b>VRYFLFGVLF</b>  | 99  |
|                       | ↓                  | ↓                  | ↓                  | ↓                  | ↓                  |     |
| 5D Tursiops truncatus | AVCFSCLLTH         | ASNLVELVWG         | QVSSSWTTIL         | CTAIGVSLWQ         | TIIATEYVTL         | 148 |
| Consensus 5D mammals  | <b>ALCFSCLLAH</b>  | <b>ASNLV</b> KLVRG | <b>RV</b> SFSWTTIL | <b>CIAIGCSLLQ</b>  | <b>TIIAIEYVTL</b>  | 149 |
|                       | ↓                  |                    |                    |                    | ↓                  |     |
|                       |                    |                    | 180                |                    |                    |     |
| 5D Tursiops truncatus | IVTRGTMFMD         | MTPCQLNVDF         | AVLLVYVLF          | LALTFFVSKA         | TFCGPCEDWK         | 198 |
| Consensus 5D mammals  | IMTRGMMFVH         | MTPCQLNVDF         | <b>VVLLVYVLF</b>   | <b>MALTFFVSKA</b>  | <b>TFCGPCENWK</b>  | 199 |
|                       |                    |                    |                    |                    |                    |     |
|                       |                    | 220                |                    | 240                |                    |     |
| 5D Tursiops truncatus | RRGRLVFLTA         | LISIIIWVW          | ISMLMRG- - -       | - - - - QWDDP      | ILCIALVTHA         | 240 |
| Consensus 5D mammals  | QHGR <b>LIFVTV</b> | <b>LISIIIWVW</b>   | <b>ISML</b> LRGNPQ | LQRQPQWDDP         | <b>VICIALVTNA</b>  | 249 |
|                       | ↓                  |                    |                    | ↓                  |                    |     |
|                       | 260                |                    | 280                |                    | 300                |     |
| 5D Tursiops truncatus | WVFLLLYIIP         | ELCFL- RSCQ        | QDCPLQGNTC         | PLPA- ECSFR        | VENQQLSR- -        | 286 |
| Consensus 5D mammals  | <b>WVFLLLYIIP</b>  | <b>ELC</b> ILYRSCR | QDCPLQGNAC         | PVPAYQRSFR         | VENQELSRAR         | 299 |
|                       |                    |                    |                    |                    |                    |     |
|                       |                    | 320                |                    | 340                |                    |     |
| 5D Tursiops truncatus | - - - - -          | - - - - -          | - TVDPTQEDF        | IPWAKVSPQQ         | DAEL               | 309 |
| Consensus 5D mammals  | <b>DSDGAEEDVA</b>  | <b>LTSYGTPIQL</b>  | <b>QTVDPTQEYF</b>  | <b>IPRAKLSPQQ</b>  | <b>DAG-</b>        | 342 |
